60. Janssen SP, Truin M, Van Kleef M, Joosten EA: Differential GABAergic disinhibition during the development of painful peripheral neuropathy. *Neuroscience* 2011; 184:183–94
61. Coull JA, Boudreau D, Bachand K, Prescott SA, Nault F, Sik A, De Koninck P, De Koninck Y: Trans-synaptic shift in anion gradient in spinal lamina I neurons as a mechanism of neuropathic pain. *Nature* 2003; 424:938–42
62. Yowtak J, Lee KY, Kim HY, Wang J, Kim HK, Chung K, Chung JM: Reactive oxygen species contribute to neuropathic pain by reducing spinal GABA release. *Pain* 2011; 152:844–52

## ANESTHESIOLOGY REFLECTIONS FROM THE WOOD LIBRARY-MUSEUM

### Holy Moly: Hermes' Anticholinesterase Antidote

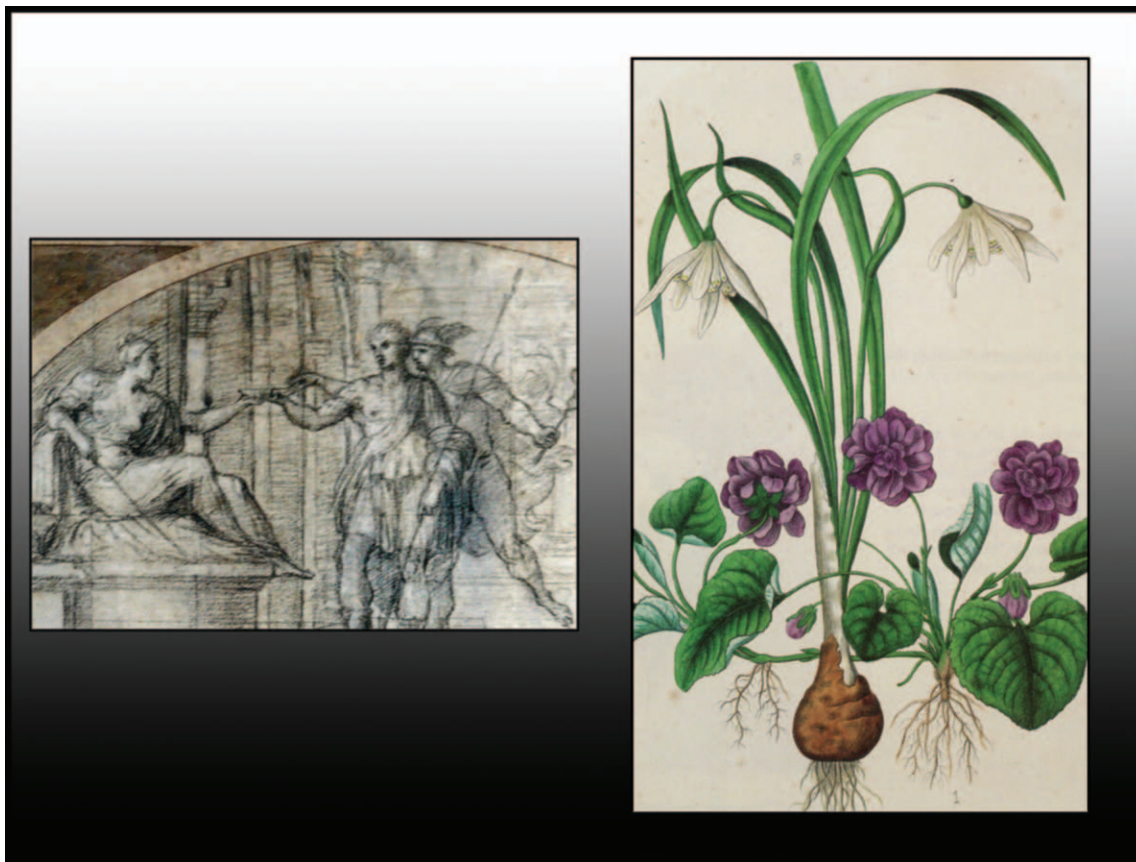

Above the double-flowering sweet violets (ca.1870, *right*), W. H. Prestele depicted Snowdrops from the genus *Galanthus* of winter/spring blooming plants with dark roots and down-facing white flowers. Snowdrops were linked (1722) by British poet Thomas Tickell to the herb Moly that wing-helmeted Hermes (*left*, A. Carracci's ca.1590 *Mercury Protecting Ulysses from the Charms of Circe*) gave Odysseus (Ulysses) to counteract the potion of the witch-goddess Circe. Plaitakis and Duvoisin (1983) have suggested that the Snowdrop's anticholinesterase inhibitor, galant(h)amine, could be apotropaic (warding off evil) against the tropane alkaloidal effects of Circe's anticholinergic potion. (Copyright © the American Society of Anesthesiologists, Inc.)

George S. Bause, M.D., M.P.H., Honorary Curator, ASA's Wood Library-Museum of Anesthesiology, Schaumburg, Illinois, and Clinical Associate Professor, Case Western Reserve University, Cleveland, Ohio. UJYC@aol.com.
